# Supplementary material for: Silica nanowire assemblies as three-dimensional, optically transparent platforms for constructing highly active SERS substrates
Source: Royal Society of Chemistry journal article supplement (doi:10.1039/c7nr06662g), 2017-01-01
Supplement: c7nr06662g1.pdf [file c7nr06662g1.pdf]

## Supporting Information

### Silica nanowire assemblies as three-dimensional, optically transparent platforms for constructing highly active SERS substrates

*Yinghua Liu, Chao Deng, Deliang Yi, Xingdong Wang, Yi Tang and Yajun Wang\**

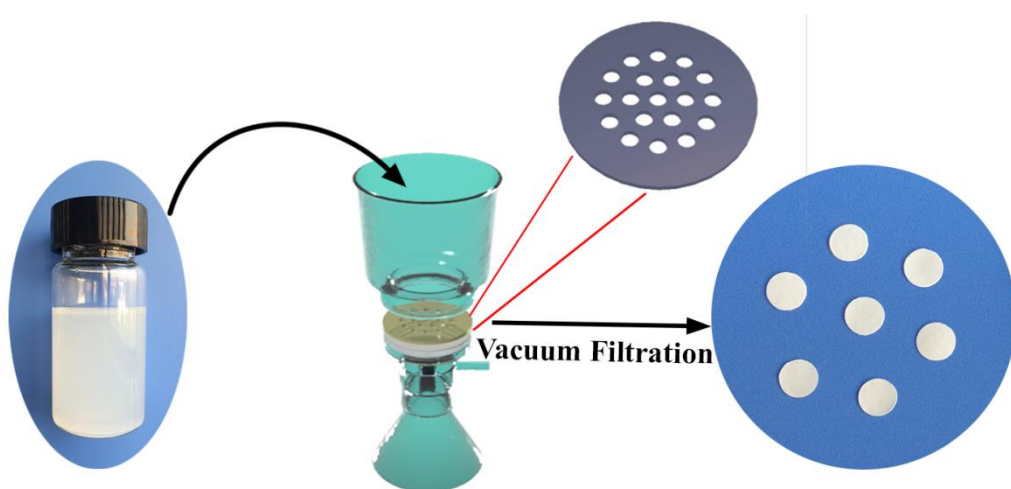

**Fig. S1** The experimental setup used to assemble the free-standing SiO<sub>2</sub> NW membrane.

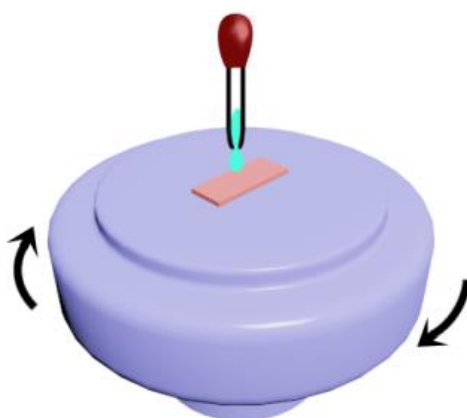

**Fig. S2** The experimental setup used to assemble the Scotch tape-supported SiO<sub>2</sub> NW film.

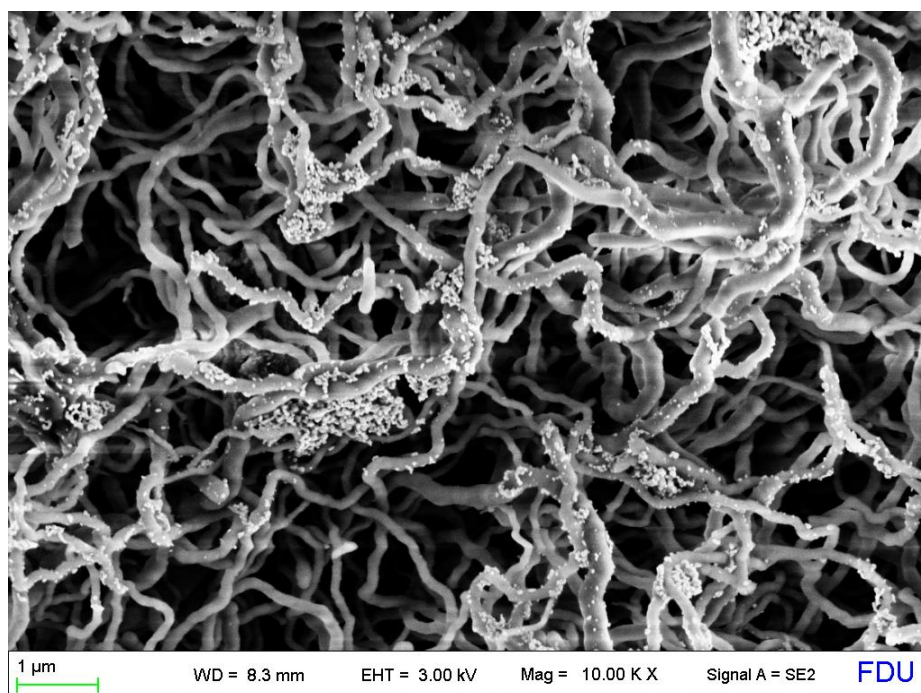

**Fig. S3** SEM image of the AgNPs-deposited SiO<sub>2</sub> NW membrane without annealing treatment to remove the C<sub>18</sub> alkyl groups from the as-prepared SiO<sub>2</sub> NWs.

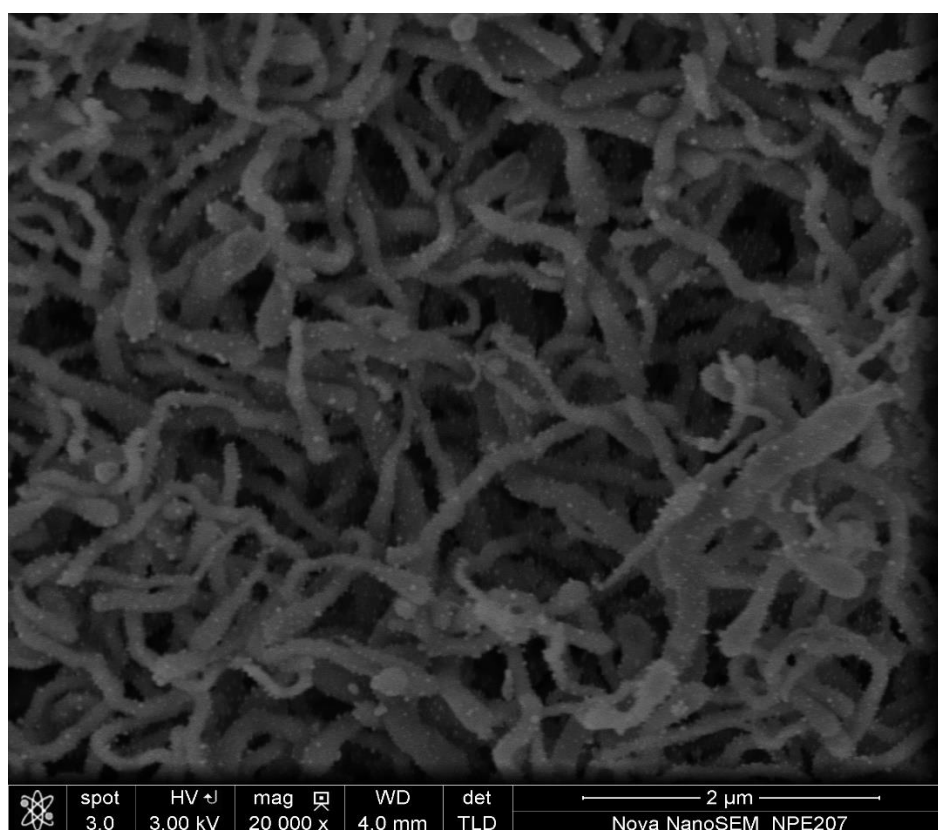

**Fig. S4** SEM image of the AgNPs-deposited SiO<sub>2</sub> NW membrane prepared with a AgNO<sub>3</sub> concentration of 0.5 mg mL<sup>-1</sup>.

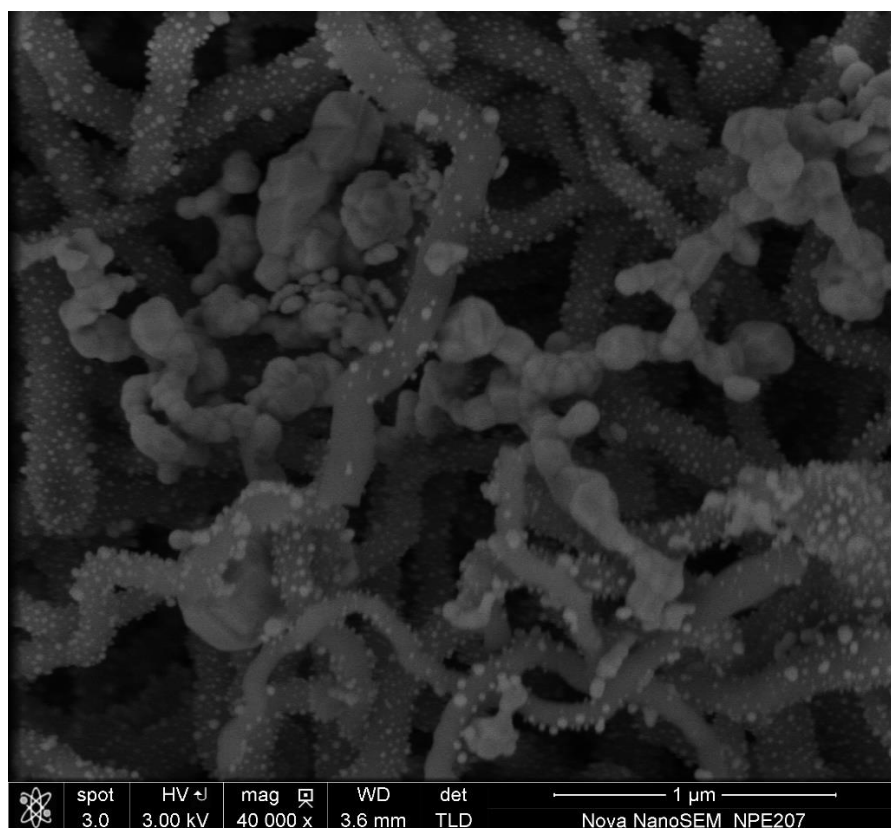

**Fig. S5** SEM image of the AgNPs-deposited SiO<sub>2</sub> NW membrane prepared with a AgNO<sub>3</sub> concentration of 1.5 mg mL<sup>-1</sup>.

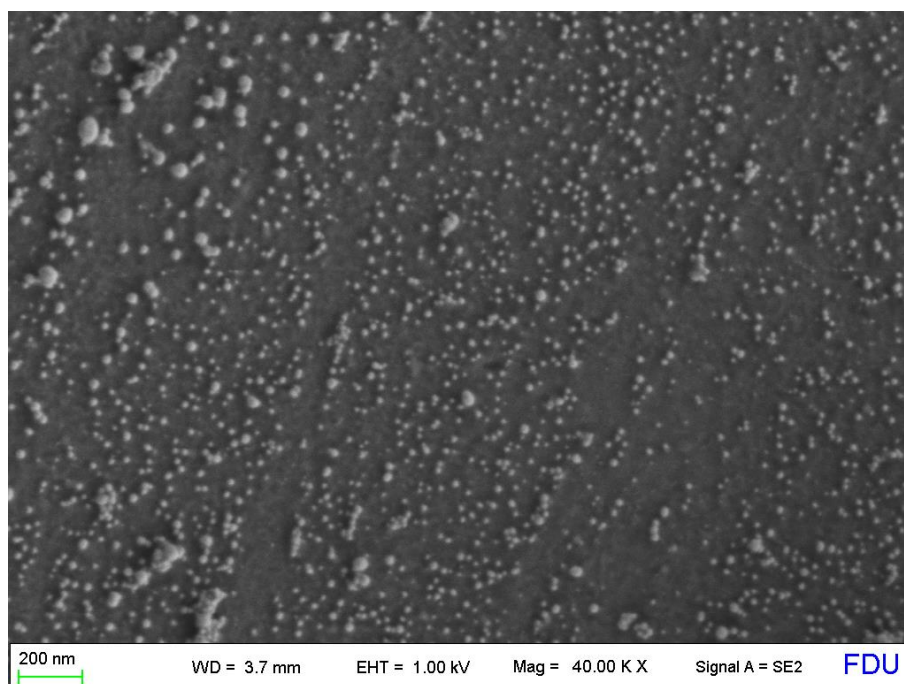

**Fig. S6** SEM image of the AgNPs-deposited glass slide, which was pretreated with 0.01 M NaOH for 2 h.

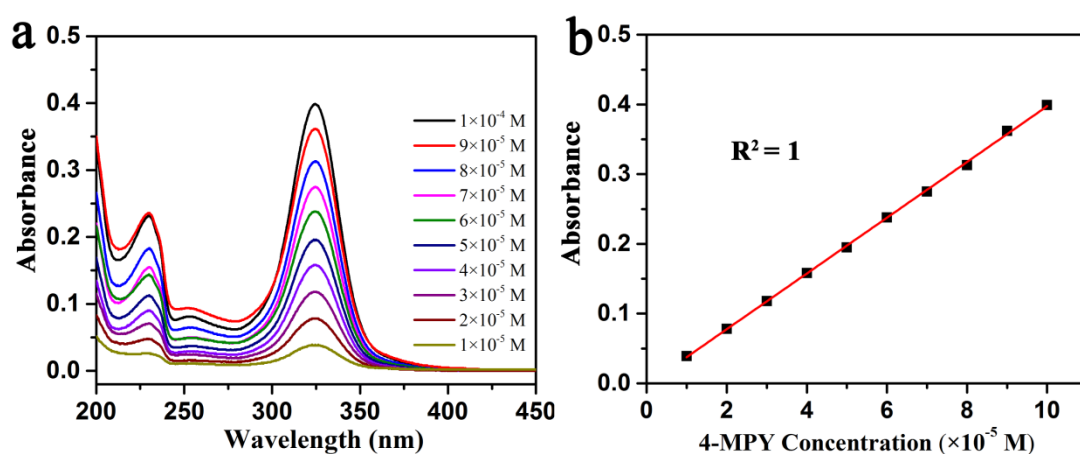

**Fig. S7** (a) UV-Visible spectra of 4-MPY solution at different concentrations. (b) Calibration curve used for the measurement of 4-MPY absorption on the SERS membrane using the peak at 325 nm.

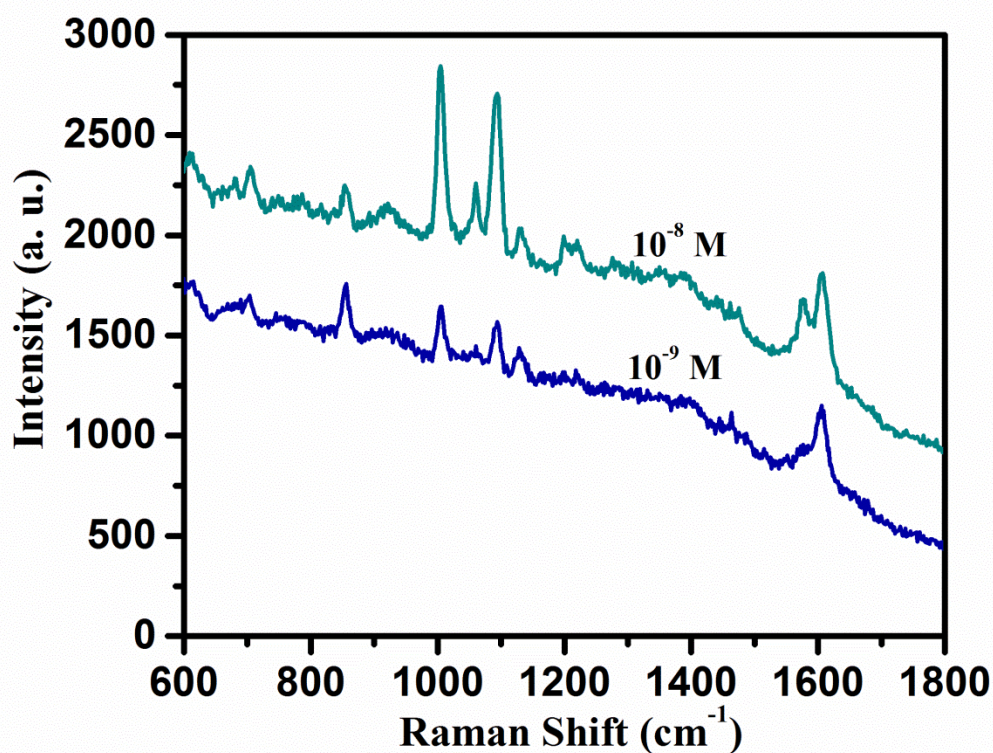

**Fig. S8** SERS spectra of 4-MPY solution  $10^{-8}$  and  $10^{-9}$  M on a AgNPs-deposited SERS membrane.

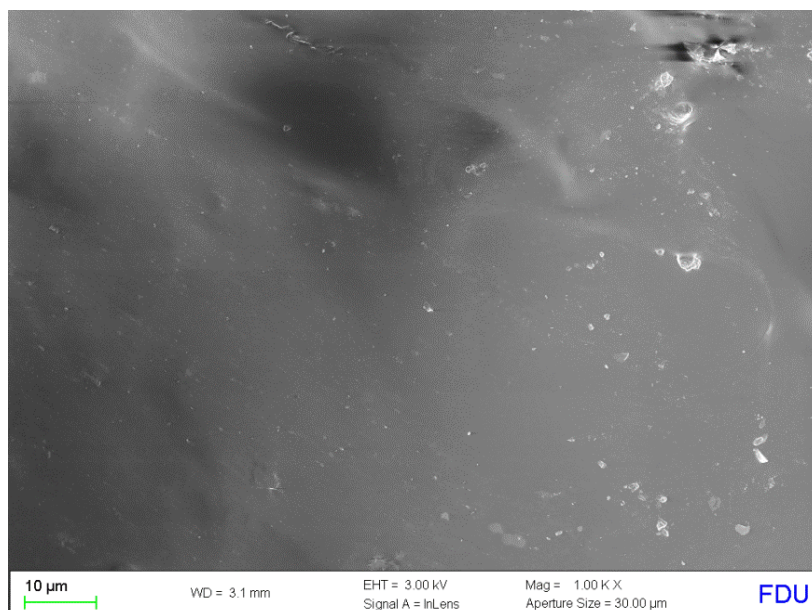

**Fig. S9** SEM image of the sticky side of the Scotch tape.

### Calculation of the enhancement factor (EF) for detecting 4-MPY:

The EF was calculated using the equation

$$EF = \frac{I_{SERS}/N_{SERS}}{I_{bulk}/N_{bulk}}$$

where  $I_{SERS}$  and  $I_{bulk}$  represent the intensity of the same band of 4-MPY (here,  $1606\text{ cm}^{-1}$ ) of SERS spectrum and normal Raman spectrum, and  $N_{SERS}$  and  $N_{bulk}$  represent the corresponding number of molecules in the focused incident laser spot.

The number of 4-MPY molecules adsorbed in the laser spot focused membrane substrate was *ca.*  $3.56 \times 10^7$ , determined through measuring UV-Vis spectral decrease of solution after soaking the membrane in 4-MPY solution ( $1.0 \times 10^{-5}\text{ M}$ ) for one hour. To estimate the molecule number illuminated in the normal Raman characterization, 4-MPY solid was directly tested according to method previously reported.<sup>1</sup> The depth of field penetration of the laser into the 4-MPY solid was about  $2.55\text{ }\mu\text{m}$ .<sup>1</sup> The density of 4-MPY solid was  $1.2\text{ g cm}^{-3}$ . Hence, the number of 4-MPY molecules in the laser spot (diameter,  $1.56\text{ }\mu\text{m}$ ) was approximate  $3.31 \times 10^{13}$  in the normal Raman characterization. The obtained  $I_{SERS}$  and  $I_{bulk}$  were 11492 unites and 37 unites, respectively. Therafter, the EF was calculated to be  $2.9 \times 10^8$ .

### Reference

<sup>1</sup> R. A. Álvarez-Puebla, *J. Phys. Chem. Lett.*, **2012**, 3, 857.
